# Supplementary material for: The Genotypic Population Structure of Mycobacterium tuberculosis Complex from Moroccan Patients Reveals a Predominance of Euro-American Lineages
Source: PubMed Central journal article supplement (PMC3471964; doi:10.1371/journal.pone.0047113), 2012-10-15
Supplement: pone.0047113.s001.pdf [file pone.0047113.s001.pdf]

<sup>b</sup> Clade designations according to SITVIT2 using revised SpoIDB4 rules; Unk: Unknown pattern within any of the major clades described in SITVIT2 database.

<sup>a</sup> In this study, 129 distinct spoligotype patterns were obtained from 592 *M. tuberculosis* isolates; 523/592 (88.3%) were clustered (60 clusters, 2-155 strains/cluster), and 69 (11.7%) were unclustered. A total of 96 SITs containing 543 isolates matched a pre-existing shared type in SITVIT2, whereas 9 SITs (containing 25 isolates) were newly-created either within the present study or after a match with an orphan in the database (showed by an asterisk; SIT2836, SIT3051, SIT3072, SIT3073, SIT3074, SIT3075, SIT3076, SIT3077, SIT3078).

<sup>b</sup> Clade designations according to SITVIT2 using revised SpoIDB4 rules; Unk: Unknown pattern within any of the major clades described in SITVIT2 database
