# Supplementary material for: The Genotypic Population Structure of Mycobacterium tuberculosis Complex from Moroccan Patients Reveals a Predominance of Euro-American Lineages
Source: PubMed Central journal article supplement (PMC3471964; doi:10.1371/journal.pone.0047113), 2012-10-15
Supplement: pone.0047113.s003.pdf [file pone.0047113.s003.pdf]

**Supplemental Table S3.** Allelic diversity of MIRU markers observed for *M. tuberculosis* strains (n=114) isolated in Casablanca.

| MIRU-VNTR<br>locus | Number of repeats |     |     |    |    |    |   |    | HGDI <sup>a</sup> |
|--------------------|-------------------|-----|-----|----|----|----|---|----|-------------------|
|                    | 1                 | 2   | 3   | 4  | 5  | 6  | 7 | 8  |                   |
| 2                  | 14                | 91  | 9   |    |    |    |   |    | 0.345             |
| 4                  | 3                 | 97  | 12  | 2  |    |    |   |    | 0.266             |
| 10                 |                   |     | 24  | 52 | 32 | 2  |   | 4  | 0.673             |
| 16                 | 6                 | 16  | 92  |    |    |    |   |    | 0.329             |
| 20                 | 26                | 88  |     |    |    |    |   |    | 0.355             |
| 23                 | 1                 | 1   | 29  | 10 | 31 | 36 | 6 |    | 0.758             |
| 24                 | 114               |     |     |    |    |    |   |    | 0                 |
| 26                 | 6                 | 1   | 3   | 9  | 61 | 15 | 9 | 10 | 0.679             |
| 27                 | 1                 | 4   | 109 |    |    |    |   |    | 0.085             |
| 31                 |                   | 8   | 78  | 27 | 1  |    |   |    | 0.475             |
| 39                 | 3                 | 111 |     |    |    |    |   |    | 0.052             |
| 40                 | 5                 | 24  | 47  | 25 | 4  | 5  | 3 | 1  | 0.738             |

<sup>a</sup> HGDI, Hunter and Gaston Discriminatory Index.
