# Supplementary material for: The Genotypic Population Structure of Mycobacterium tuberculosis Complex from Moroccan Patients Reveals a Predominance of Euro-American Lineages
Source: PLoS One. 2012 Oct 15;7(10):e47113. doi: 10.1371/journal.pone.0047113 (PMC3471964; doi:10.1371/journal.pone.0047113)
Supplement: Table S2 — Detailed results obtained including demographic, drug-resistance, and genotyping information on a total of 114 M. tuberculosis strains isolated in Casablanca, Morocco. (PDF) [file pone.0047113.s002.pdf]

**Supplemental Table S2.** Detailed results obtained including demographic, drug-resistance, and genotyping information on a total of 114 *M. tuberculosis* strains isolated in Casablanca, Morocco.

[illegible]

[illegible]

<sup>a</sup> DST, Drug Susceptibility Testing: 0, information not available in database; 1, pansusceptible; 2, multidrug-resistant (isoniazid + rifampin), 3, any resistance.

<sup>b</sup> Drugs, indicates the profile of resistance if any resistance has been detected: S, Streptomycin; I, Isoniazid; R, Rifampicin; E, Ethambutol

<sup>c</sup> Clade designations according to SITVIT2 using revised SpolDB4 rules; Unk: Unknown pattern within any of the major clades described in SITVIT2 database
